# Supplementary material for: RECQ5 helicase associates with the C-terminal repeat domain of RNA polymerase II during productive elongation phase of transcription
Source: PubMed Central journal article supplement — Nucleic Acids Res. 2010 Aug 12;38(22):8131–40. doi: 10.1093/nar/gkq697 (PMC3001069; doi:10.1093/nar/gkq697), 2010-08-12
Supplement: supp_gkq697_Supplementary_Data.pdf [file supp_gkq697_Supplementary_Data.pdf]

**Supplementary Table 1.** Antibodies used in this study.

| <b>Name</b>                                                | <b>Description</b>                                                                                                            | <b>Source/Reference</b>               | <b>Catalogue number</b> |
|------------------------------------------------------------|-------------------------------------------------------------------------------------------------------------------------------|---------------------------------------|-------------------------|
| RNA Polymerase II 8WG16 antibody                           | Mouse monoclonal IgG2a antibody recognizing the non-phosphorylated form of RNAPII CTD repeat YSPTSPS (used for ChIP)          | Covance                               | MMS-126R                |
| RNA Polymerase II H5 antibody                              | Mouse monoclonal IgM antibody recognizing the phosphoserine 2 version of RNAPII CTD repeat YSPTSPS (used for Western blot)    | Covance                               | MMS-129R                |
| RNA Polymerase II CTD repeat YSPTSPS (phospho S2) antibody | Rabbit polyclonal antibody recognizing the phosphoserine 2 version of RNAPII CTD repeat YSPTSPS (used for ChIP)               | Abcam                                 | ab5095                  |
| RNA polymerase II 7C2 antibody                             | Mouse monoclonal antibody that recognizes CTD irrespective of its phosphorylation status (used for Western blot)              | A kind gift from Prof. Jean Marc Egly |                         |
| RECQ5 antibody                                             | Rabbit polyclonal antibody raised against C-terminal fragment of RECQ5 (amino acids 675-991)                                  | Kanagaraj et al (2006)                |                         |
| GFP antibody                                               | Rabbit polyclonal antibody against GFP (used for ChIP)                                                                        | Abcam                                 | ab290                   |
| $\beta$ Tubulin (D-10) antibody                            | Mouse monoclonal antibody raised against a recombinant protein corresponding to amino acids 210-444 of human $\beta$ -tubulin | Santa Cruz                            | sc-5274                 |
| Sheep anti-mouse IgG HRP                                   | Secondary antibody used for Western blot                                                                                      | GE Healthcare                         | NA931V                  |
| Goat anti-mouse IgM HRP                                    | Secondary antibody used for Western blot                                                                                      | Southern Biotech                      | 1021-05                 |

**Supplementary Table 2.** Sequences of primers and parameters of amplicons used for quantitative real time PCR analysis.

| Amplicon | Sequences of primers                                                     | Annealing temperature (°C) | Length of amplicon (bp) | Central bp position relative to TSS |
|----------|--------------------------------------------------------------------------|----------------------------|-------------------------|-------------------------------------|
| ACTG1    |                                                                          |                            |                         |                                     |
| 1        | FOR: 5'-ggaaagatcgccatatatggac-3'<br>REV: 5'-tcaccggcagagaaacgcgac-3'    | 57                         | 174                     | -15                                 |
| 2        | FOR: 5'-gctgttcaggctctgttcc-3'<br>REV: 5'-atgctcacacgccacaacatgc-3       | 57                         | 134                     | +1055                               |
| 3        | FOR: 5'-gtgacacagcatcactaagg-3'<br>REV: 5'-acagcaccgtgttggcgt-3          | 57                         | 134                     | +1722                               |
| 4        | FOR: 5'-tctgtcagggttgaaagtc-3'<br>REV: 5'-aatgcaaaccgcttccaac-3          | 57                         | 114                     | +2605                               |
| 5        | FOR: 5'-gtgacacagtgcagaccctat-3'<br>REV: 5'-gattgtaggcgttctttac-3        | 57                         | 110                     | +4837                               |
| DHFR     |                                                                          |                            |                         |                                     |
| 1        | FOR: 5'-ctgcacctgtggaggagga-3'<br>REV: 5'-tccttgcctgccatgtctc-3'         | 50                         | 143                     | +196                                |
| 2        | FOR: 5'-gttctatagtcactgcatcttagtc-3<br>REV: 5'-tgctaattctggtgttcagtaag-3 | 50                         | 168                     | +16967                              |
| 3        | FOR: 5'-gagtatgtttctgtcttagattgg-3<br>REV: 5'-atgagaacctgctcgtgac-3      | 50                         | 168                     | +26533                              |
| 4        | FOR: 5'-ttgtttcaggacagggtctt-3<br>REV: 5'-ctgtggtgggaagatggct-3          | 50                         | 109                     | +46523                              |
| CDKN1A   | FOR: 5'-ccagctgggctctgcaatt-3'<br>REV: 5'-ccttcagtcattgactg-3'           | 54                         | 129                     | +7907                               |
| HSP70-2  | FOR: 5'-cgtgctcatctttgacctgg-3'<br>REV: 5'-ggaggctcaccatgcgggtg-3'       | 54                         | 140                     | +1042                               |

Note that ACTG1-3 and DHFR-2 amplicons were used for qPCR analysis shown in Figure 5. TSS, transcription start site; FOR, forward primer; REV, reverse primer; bp, base pair.

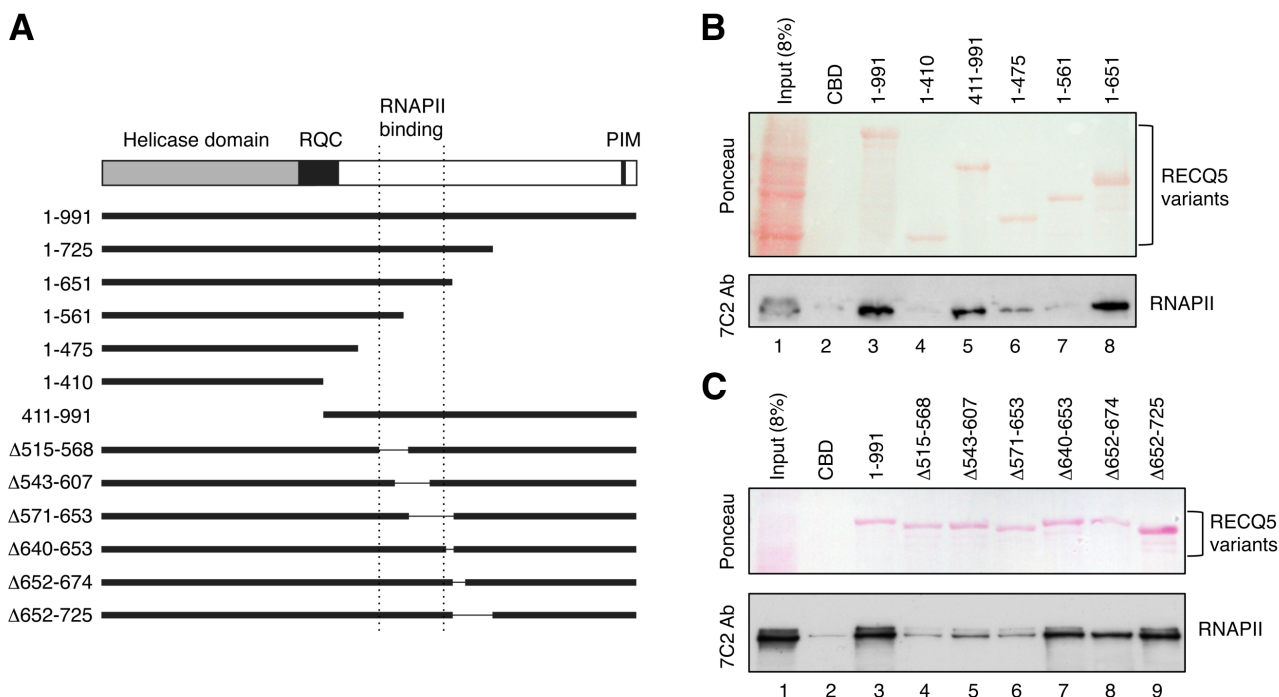

**Figure S1.** Mapping the RNAPII-interacting domain in RECQ5. **(A)** Domain organization of human RECQ5 and schemes of RECQ5 deletion variants used in this study. RQC, RecQ C-terminal domain, which contains a  $\text{Zn}^{2+}$ -binding motif that is essential for the helicase activity of RECQ5; PIM, PCNA-interacting motif. The dashed lines indicate the location of the RNAPII-interacting domain. **(B,C)** CBD pull-down assay. The indicated RECQ5 variants were produced in *E. coli* as fusions with the chitin-binding domain (CBD) and bound to chitin beads. Beads were incubated with a 293T cell extract and RNAPII binding was analyzed by Western blotting using the 7C2 antibody that binds to RNAPII CTD repeats irrespective of the phosphorylation status. Blots were also stained with Ponceau S to visualize RECQ5 and its variants. Note that phosphatase inhibitors were not included in these assays so that RNAPII is predominantly in the hypophosphorylated state.

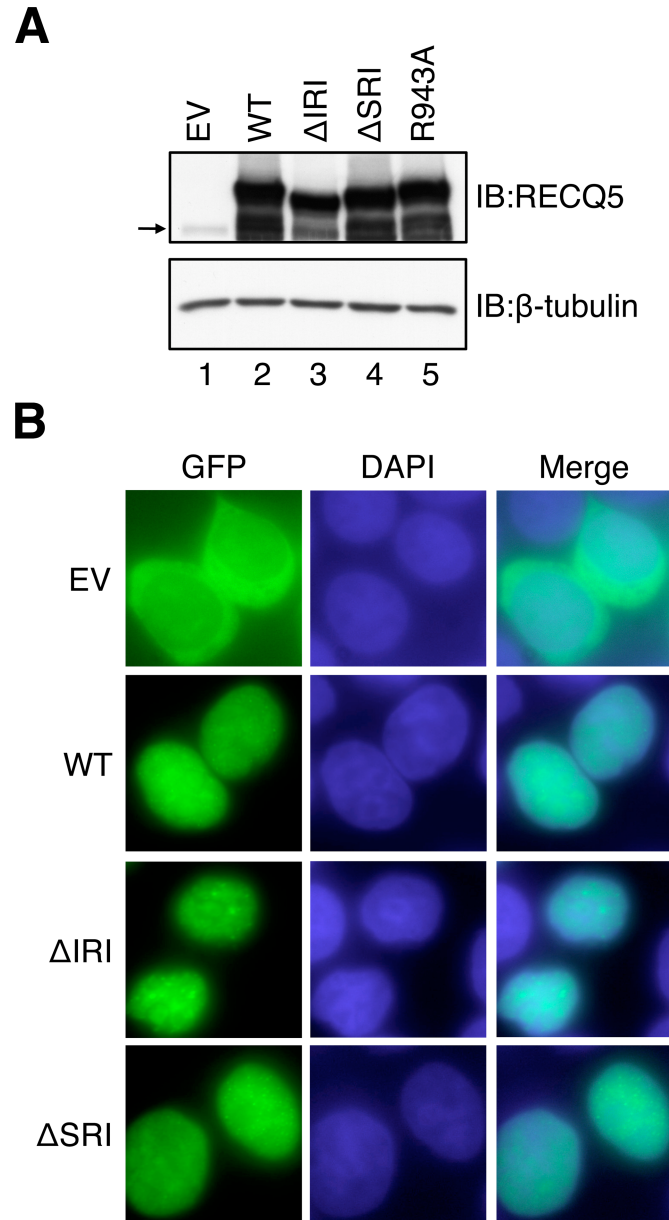

**Figure S2.** Expression of recombinant GFP-RECQ5 protein and its mutants in HEK293 cells. **(A)** Western blot analysis of extracts of HEK293 cells transiently transfected with constructs expressing GFP-tagged wild-type (WT) RECQ5 or its mutants (as indicated) or empty vector (EV). Transient transfection of expression vectors was performed as described in Materials and Methods. 48 hours post-transfection, whole-cell extracts (20  $\mu$ g of total protein) were analyzed by Western blotting using antibodies against RECQ5 and  $\beta$ -tubulin (loading control). The arrow indicates the position of endogenous RECQ5 protein. Note that the endogenous RECQ5 in lanes 2-5 is masked by degradation products of recombinant RECQ5 proteins **(B)** Subcellular localization of GFP-RECQ5 and its mutants over-expressed in HEK293 cells. 48 hours post-transfection, cells were fixed with ice-cold methanol at  $-20^{\circ}\text{C}$  for 30 minutes. Fixed cells were washed thrice with PBS and mounted on slides using Vectashield mounting medium containing DAPI (Vector Laboratories, Inc.). Images were captured on an Olympus IX81 fluorescence microscope with a CCD camera (Orca AG, Hamamatsu) using cellR software (Olympus). IB: immunoblot.

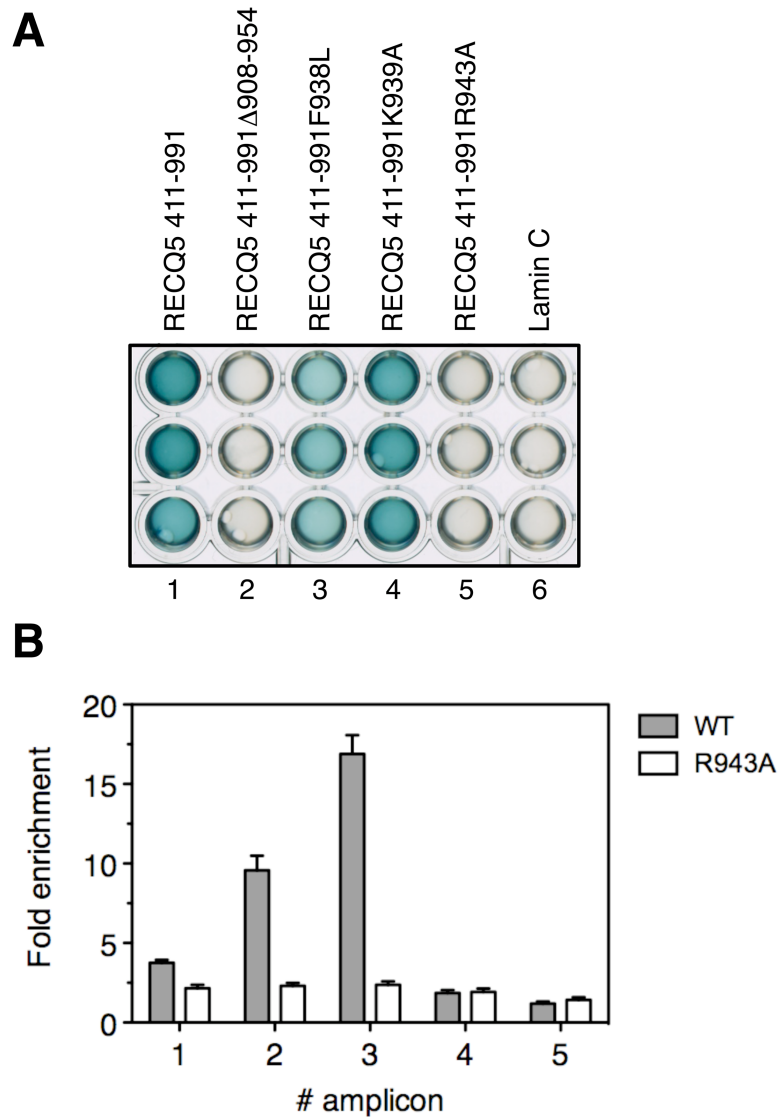

**Figure S3.** Mutational analysis of the conserved residues in the SRI domain of RECQ5. **(A)** Interaction of RECQ5 mutants with the CTD in the yeast two-hybrid system. Clones carrying the bait (RECQ5) and prey (CTD) plasmids were tested for  $\beta$ -galactosidase activity using the pellet X-gal assay. Blue color indicates a positive interaction. **(B)** Effect of the R943A substitution in the SRI domain of RECQ5 on its association with the ACTG1 gene. HEK293 cells were transfected either with empty vector (mock) or with vectors expressing wild-type (WT) or mutant (R943A) forms of RECQ5 as fusions with GFP. Forty-eight hours post-transfection, chromatin was immunoprecipitated using an anti-GFP antibody and subjected to qPCR analysis with the same amplicons as in Figure 4A (*top panel*). Fold enrichment was calculated as described in the legend of Figure 5.

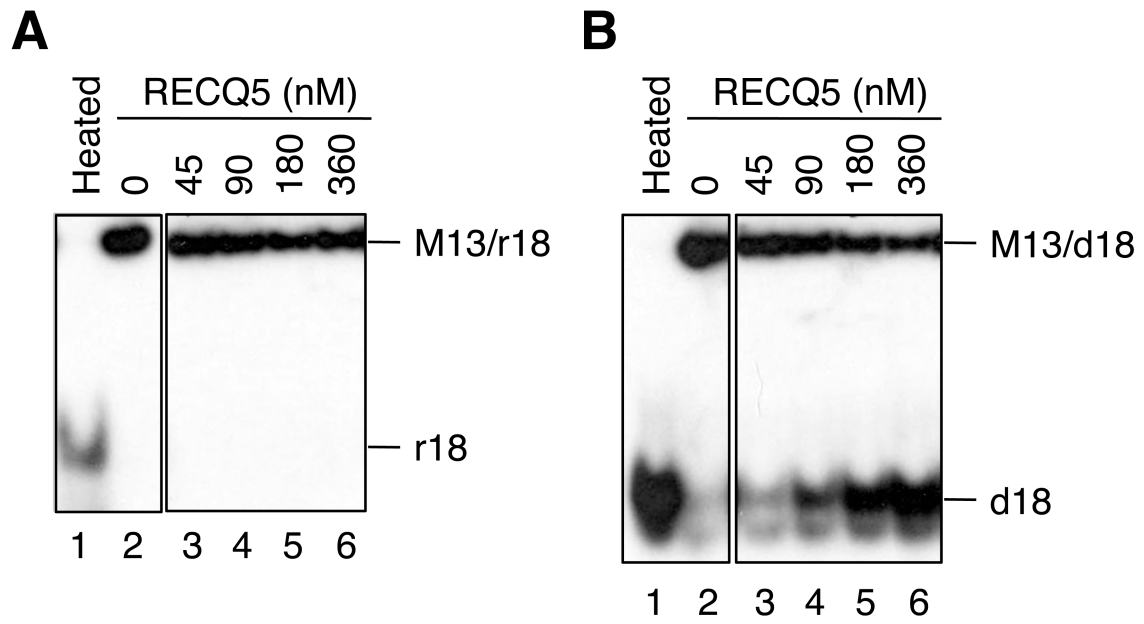

**Figure S4.** RECQ5 can not unwind RNA:DNA hybrid duplexes. Helicase activity of RECQ5, at indicated concentration, was measured on 1 nM M13mp2/r18 (DNA:RNA; panel A) and 1 nM M13/d18 (DNA:DNA; panel B) partial duplexes, respectively, as described in Materials and Methods. Lane 1, heat-denatured substrate.
